# Supplementary material
Source: MDPI journal article supplement (https://www.mdpi.com/1424-2818/15/12/1187)
Supplement: s1 [file s1]

# Ecosystem Resilience of a South African Mesic Grassland with Change from Rotational to Continuous Grazing

Nomusa Chonco \*, Rob Slotow, Zivanai Tsvuura and Sindiso Nkuna \*

Centre for Functional Biodiversity, School of Life Sciences, University of KwaZulu-Natal, Pietermaritzburg 3201, South Africa; slotow@ukzn.ac.za (R.S.); tsvuura@ukzn.ac.za (Z.T.)

\* Correspondence: nomsachonco18@gmail.com (N.C.); chamane@ukzn.ac.za (S.N.)

**Table S1.** The list of grasses (Poaceae) found in the commercial farm (CMF), cooperative farm (COP) and communal farm (CM) at Pakkies, near Kokstad, KwaZulu-Natal, South Africa. All the grasses are perennial. Nomenclature follows Fish et al. (2015) [72].

| Species name                                                         | Ecological status | Grazing value |
|----------------------------------------------------------------------|-------------------|---------------|
| <i>Alloteropsis semialata</i> (R.Br.) Hitchc.                        | Increaser II      | Moderate      |
| <i>Aristida junciformis</i> Trin. & Rupr.                            | Increaser III     | Low           |
| <i>Bothriochloa insculpta</i> (A.Rich.) A.Cumus                      | Increaser II      | Moderate      |
| <i>Brachiaria serrata</i> (Thunb.) Stapf                             | Decreaser         | Moderate      |
| <i>Cymbopogon caesioides</i> (Hook. & Arn.) Stapf                    | Increaser I       | Low           |
| <i>Digitaria monodactyla</i> (Nees) Stapf                            | Increaser II      | Moderate      |
| <i>Diheteropogon amplexans</i> (Nees) Clayton                        | Decreaser         | Moderate      |
| <i>Diheteropogon filifolius</i> (Nees) Clayton                       | Increaser II      | Low           |
| <i>Elionurus muticus</i> (Spreng.) Kuntze                            | Increaser III     | Low           |
| <i>Eragrostis capensis</i> (Thunb.) Trin.                            | Increaser II      | Moderate      |
| <i>Eragrostis chloromelas</i> Steud                                  | Increaser II      | Low           |
| <i>Eragrostis curvula</i> (Shrad.) Nees                              | Increaser II      | Moderate      |
| <i>Eragrostis plana</i> Nees                                         | Increaser II      | Low           |
| <i>Eragrostis racemosa</i> (Thunb.) Steud.                           | Increaser II      | Moderate      |
| <i>Harpachloa falx</i> (L.f.) Kuntze                                 | Increaser II      | Low           |
| <i>Heteropogon contortus</i> (L.) Roem. & Scholt.                    | Increaser II      | High          |
| <i>Hyparrhenia hirta</i> (L.) Stapf                                  | Increaser II      | Moderate      |
| <i>Microchloa caffra</i> Nees                                        | Increaser II      | Low           |
| <i>Paspalum dilatatum</i> Poir.                                      | Increaser II      | High          |
| <i>Paspalum urvillei</i> Steud.                                      | Increaser I       | Moderate      |
| <i>Setaria sphacelata</i> (Schumach.) Stapf. & C.E.Hubb. ex M.B.Moss | Increaser II      | High          |
| <i>Sporobolus africanus</i> (Poir.) Robyns. & Tournay                | Increaser II      | Low           |
| <i>Sporobolus pyramidalis</i> P.Beauv.                               | Increaser II      | Low           |
| <i>Themeda triandra</i> Forssk.                                      | Decreaser         | High          |
| <i>Trachypogon spicatus</i> (L.f.) Kuntze                            | Increaser I       | Low           |
| <i>Tristachya leucothrix</i> Trin. ex Nees                           | Increaser I       | Moderate      |

**Table S2.** The list of non-grass herbaceous plants found in the commercial farm (CMF), cooperative farm (COP) and communal farm (CM) at Pakkies area, near Kokstad, KwaZulu-Natal, South Africa. All plants are perennial. Nomenclature follows World Flora online.

| Species name                                  | Family        | Life form |
|-----------------------------------------------|---------------|-----------|
| <i>Acalypha punctata</i> Meisn. ex Krauss     | Euphorbiaceae | Herb      |
| <i>Ajuga ophrydis</i> Burch. ex Benth.        | Lamiaceae     | Herb      |
| <i>Asparagus aethiopicus</i> L.               | Asparagaceae  | Shrublet  |
| <i>Asparagus africanus</i> Lam.               | Asparagaceae  | Herb      |
| <i>Aster bakerianus</i> Burtt Davy ex C.A.Sm. | Asteraceae    | Herb      |

|                                                            |                  |          |
|------------------------------------------------------------|------------------|----------|
| <i>Berkheya purpurea</i> (DC.) Mast.                       | Asteraceae       | Herb     |
| <i>Berkheya setifera</i> DC.                               | Asteraceae       | Herb     |
| <i>Berkheya umbellata</i> DC.                              | Asteraceae       | Herb     |
| <i>Centella asiatica</i> (L.) Urb.                         | Apiaceae         | Herb     |
| <i>Cephalaria oblongifolia</i> (Kuntze) Szabó              | Dipsacaceae      | Herb     |
| <i>Cephalaria pungens</i> Szabó                            | Dipsacaceae      | Herb     |
| <i>Cineraria dieterlenii</i> E.Phillips                    | Asteraceae       | Herb     |
| <i>Crabbea acaulis</i> N.E.Br.                             | Acanthaceae      | Herb     |
| <i>Crassula lanceolata</i> Endl.                           | Crassulaceae     | Herb     |
| <i>Crotalaria obscura</i> DC.                              | Fabaceae         | Herb     |
| <i>Eriosema cordatum</i> E.Mey.                            | Fabaceae         | Herb     |
| <i>Eriosema distinctum</i> N.E.Br.                         | Fabaceae         | Herb     |
| <i>Eriosema squarrosum</i> (Thunb.) Walp.                  | Fabaceae         | Herb     |
| <i>Felicia wrightii</i> Hilliard & B.L.Burt                | Asteraceae       | Herb     |
| <i>Gerbera ambigua</i> Sch.Bip.                            | Asteraceae       | Herb     |
| <i>Gerbera piloselloides</i> Cass.                         | Asteraceae       | Herb     |
| <i>Gladiolus oppositiflorus</i> Herb.                      | Iridaceae        | Herb     |
| <i>Helichrysum aureonitens</i> Broth. & Paris              | Asteraceae       | Herb     |
| <i>Helichrysum cymosum</i> (L.) D.Don ex G.Don             | Asteraceae       | Herb     |
| <i>Helichrysum glomeratum</i> Kirk                         | Asteraceae       | Herb     |
| <i>Helichrysum nudifolium</i> (L.) Less.                   | Asteraceae       | Herb     |
| <i>Helichrysum odoratissimum</i> Sweet                     | Asteraceae       | Herb     |
| <i>Helichrysum pilosellum</i> Less.                        | Asteraceae       | Herb     |
| <i>Helichrysum splendidum</i> Less.                        | Asteraceae       | Herb     |
| <i>Hermannia depressa</i> N.E.Br.                          | Malvaceae        | Herb     |
| <i>Hibiscus aethiopicus</i> L.                             | Malvaceae        | Herb     |
| <i>Hibiscus pusillus</i> Thunb.                            | Malvaceae        | Herb     |
| <i>Hypoxis argentea</i> Harv. ex Baker                     | Hypoxidaceae     | Herb     |
| <i>Hypoxis hemerocallidea</i> Fisch., C.A.Mey. & Avé-Lall. | Hypoxidaceae     | Herb     |
| <i>Hypoxis rigidula</i> Baker                              | Hypoxidaceae     | Herb     |
| <i>Launaea sarmentosa</i> (Willd.) Kuntze                  | Asteraceae       | Herb     |
| <i>Ledebouria cooperi</i> (Hook.f.) Jessop                 | Asparagaceae     | Bulb     |
| <i>Ledebouria ovatifolia</i> (Baker) Jessop                | Asparagaceae     | Bulb     |
| <i>Lotononis foliosa</i> Bolus                             | Fabaceae         | Herb     |
| <i>Lotononis viminea</i> (E.Mey.) B.-E.van Wyk             | Fabaceae         | Herb     |
| <i>Oxalis obliquifolia</i> Steud. ex A.Rich.               | Oxalidaceae      | Herb     |
| <i>Pentanisia angustifolia</i> Hochst.                     | Rubiaceae        | Herb     |
| <i>Polygala rehmannii</i> Chodat                           | Polygalaceae     | Herb     |
| <i>Rafnia elliptica</i> Thunb.                             | Fabaceae         | Shrublet |
| <i>Rhynchosia cooperi</i> (Baker f.) Harv. ex Burt Davy    | Fabaceae         | Herb     |
| <i>Rhynchosia minima</i> (L.) DC.                          | Fabaceae         | Shrublet |
| <i>Rhynchosia totta</i> (Thunb.) DC.                       | Fabaceae         | Herb     |
| <i>Rhynchosia villosa</i> (Meisn.) Druce                   | Fabaceae         | Herb     |
| <i>Roella glomerata</i> A.DC.                              | Campanulaceae    | Shrublet |
| <i>Senecio coronatus</i> Harv.                             | Asteraceae       | Herb     |
| <i>Senecio latifolius</i> Mast.                            | Asteraceae       | Herb     |
| <i>Senecio speciosus</i> Willd.                            | Asteraceae       | Herb     |
| <i>Striga bilabiata</i> (Thunb.) Kuntze                    | Scrophulariaceae | Herb     |
| <i>Talinum caffrum</i> (Thunb.) Eckl. & Zeyh.              | Portulacaceae    | Herb     |
| <i>Tephrosia grandiflora</i> (L'Hér.) Pers.                | Fabaceae         | Shrublet |

**Table S3.** Number of forb species for each family in the commercial (CMF), cooperative (COP) and communal (CF) farms at Pakkies near Kokstad, KwaZulu-Natal, South Africa.

| Family      | CMF | COP | CF |
|-------------|-----|-----|----|
| Acanthaceae | 1   | 0   | 0  |

---

|                  |    |    |    |
|------------------|----|----|----|
| Apiaceae         | 1  | 1  | 1  |
| Asparagaceae     | 4  | 2  | 0  |
| Asteraceae       | 17 | 15 | 13 |
| Campanulaceae    | 1  | 0  | 0  |
| Caprifoliaceae   | 1  | 1  | 1  |
| Crassulaceae     | 1  | 0  | 2  |
| Dipsacaceae      | 0  | 0  | 1  |
| Euphorbiaceae    | 8  | 6  | 11 |
| Fabaceae         | 1  | 3  | 2  |
| Hypoxidaceae     | 1  | 1  | 1  |
| Iridaceae        | 1  | 1  | 1  |
| Lamiaceae        | 3  | 1  | 2  |
| Malvaceae        | 1  | 1  | 1  |
| Oxalidaceae      | 1  | 0  | 0  |
| Polygalaceae     | 0  | 0  | 1  |
| Portulacaceae    | 1  | 0  | 0  |
| Rubiaceae        | 0  | 1  | 1  |
| Scrophulariaceae | 1  | 0  | 0  |

---

## References

72. Fish L., Mashau A.C., Moeaha M.J. and Nembudani M.T. 2015. Identification guide to Southern African grasses. An identification manual with keys, descriptions and distributions. Strelitzia 36. South African Biodiversity Institute, Pretoria. World Flora Online, <http://www.worldfloraonline.org/>, accessed on 19 November 2023.

**Disclaimer/Publisher's Note:** The statements, opinions and data contained in all publications are solely those of the individual author(s) and contributor(s) and not of MDPI and/or the editor(s). MDPI and/or the editor(s) disclaim responsibility for any injury to people or property resulting from any ideas, methods, instructions or products referred to in the content.
